# Supplementary material for: JOSD2 regulates PKM2 nuclear translocation and reduces acute myeloid leukemia progression
Source: PubMed Central journal article supplement (PMC9281007; doi:10.1186/s40164-022-00295-w), 2022-07-14
Supplement: 40164_2022_295_MOESM1_ESM.pdf [file 40164_2022_295_MOESM1_ESM.pdf]

## **Additional File for:**

### **JOSD2 regulates PKM2 nuclear translocation and reduces acute myeloid leukemia progression**

Hu Lei<sup>1†\*</sup>, Li Yang<sup>1†</sup>, Yingying Wang<sup>1</sup>, Zihui Zou<sup>1</sup>, Meng Liu<sup>1</sup>, Hanzhang Xu<sup>1\*</sup>, Yingli Wu<sup>1,2\*</sup>

<sup>1</sup>Hongqiao International Institute of Medicine, Shanghai Tongren Hospital/Faculty of Basic Medicine, Key Laboratory of Cell Differentiation and Apoptosis of the Chinese Ministry of Education, Shanghai Jiao Tong University School of Medicine, Shanghai 200025, China

<sup>2</sup>Shanghai Jiao Tong University, Research Units of Stress and Tumor (2019RU043), Chinese Academy of Medical Sciences, Sch Med, Shanghai 200025, China

†These authors contributed equally to this work

\*Correspondence

Yingli Wu. E-mail: [wuyingli@shsmu.edu.cn](mailto:wuyingli@shsmu.edu.cn)

Hanzhang Xu. E-mail: [xuhanzhang@shsmu.edu.cn](mailto:xuhanzhang@shsmu.edu.cn)

Hu Lei. E-mail: [hulei@shsmu.edu.cn](mailto:hulei@shsmu.edu.cn)

## **MATERIALS AND METHODS**

### **Reagents and antibodies**

PKM2 (4053), cleaved-caspase-3 (9664), cytochrome C (4280), p62 (8025), c-myc (9402), cyclin D1 (2922) and phospho-PKM2 (Tyr105) (3827) antibody were purchased from Cell Signaling Technology. BCL2 (sc-7382) and MCL1 (sc-12756) antibody were purchased from Santa Cruz Biotechnology. Antibody specific for  $\alpha$ -tubulin (11224-1-AP), flag tag (66008-2-Ig) and  $\beta$ -actin (60008-1-Ig) were purchased from Proteintech. JOSD1 (ab118221) antibody was purchased from Abcam. JOSD2 (OAAB00616) antibody was purchased from Aviva Systems Biology. Phospho-PKM2 (Ser37) (GTX133886) antibody was purchased from GeneTex. PKM2-Ac433 antibody was provided by professor Qunying Lei. Flag-bead (M20018) was purchased from Abmart. Nuclear protein and cytoplasmic protein extraction kit (P0027) was purchased from Beyotime.

### **Cell culture**

HL60, NB4 and U937 were maintained in RPMI-1640 (Gibco, 21875109) supplemented with 10% heat-inactivated fetal bovine serum (Gemini, 900-108), penicillin (50 U/ml)/streptomycin (50  $\mu$ g/ml) (Sangon Biotech, E607011). All cells were cultured at 37 °C in a humidified atmosphere of 5% CO<sub>2</sub>.

### **Quantitative RT-PCR**

Total RNA was extracted with Trizol reagent (Invitrogen) and reverse transcription into cDNA by Reverse Transcriptase kit (Takara). SYBR (Roche) and Applied Biosystems Step One Plus™ detection system (ABI 7900) were used for real-time quantitative PCR. Specific primers are shown as follows: JOSD1 F: GTG GAT TGG AGG CGA GAG, R: AGC AGG AGT TCA CAG TTC TT; JOSD2 F: TGA GAT CTG CAA GAG GTT, R: ATC ACA TTG ACA TCA TAG TTG; Cyclin D1 F: GCG GAG GAG AAC AAA CAG, R: GCG GTA GTA GGA CAG GAA, C-myc F: GCG ACT CTG AGG AGG AA, R: TGC GTA GTT GTG CTG ATG; GAPDH F: CTT AGC ACC CCT GGC CAA G, R: TGG TCA TGA GTC CTT CCA CG.

### **Immunoprecipitation and immunoblot analysis**

Flag-JOSD2 overexpressed HL60 cells were prepared with lysis buffer (Beyotime, P0013) and incubated overnight with Anti-flag beads at 4°C overnight. Wash with PBST buffer for three times and separate with SDS-PAGE. These proteins are transferred to nitrocellulose membranes and detected with appropriate antibodies.

### **Immunofluorescence**

The cultured cells were fixed to a slide by a cytospin and fixed with 0.3% Triton X-100. After permeabilization with 100% cold methanol and blocking with 2% (w/v) bovine serum albumin, the cells were incubated JOSD2 antibody (1:100 dilution) or/and PKM2 antibody (1:100 dilution) overnight at 4 °C. Then, the slides were stained with the secondary antibody and DAPI. The fluorescence signal of the cells was detected by confocal microscopy (Nikon, A1R-si).

### **B-NDG mice model**

B-NDG mice, NOD-SCID IL-2 receptor gamma null mice, 6-week-old were obtained from Jiangsu Biocytogen Co., Ltd (Nantong, China). HL60-NC and HL60-JOSD2 cells ( $5 \times 10^6$ ) were injected into the tail vein of six or seven mice per group. When the mice developed humpback and/or hind limb paralysis, they were killed and their spleens were measured. The survival of mice from the tail vein model is represented with a Kaplan-Meier survival plot.

### **Statistical analysis**

All data are present as mean $\pm$ SD. One-way ANOVA was used for analyzing significant difference of multiple groups, Student's *t*-test was used to determine significances between two groups. All statistical tests were performed using the GraphPad Prism 8, *P* values<0.05 were considered to be statistically significant.

**Table 1 The information of AML patients**

| AML type | Gender | Age | WBC( $\times 10^9$ ) | Blast (%) | Genetic abnormality |
|----------|--------|-----|----------------------|-----------|---------------------|
| M0       | female | 43  | 75.39                | 28        | NPM1                |
|          | male   | 55  | 135.9                | 34        | FLT3-ITD            |
|          | female | 62  | 85.23                | 38        | NA                  |
| M1       | female | 16  | 6.48                 | 62        | FLT3-ITD            |
|          | male   | 12  | 6.78                 | 52        | CEBPA               |
|          | female | 64  | 7.96                 | 62        | NA                  |
|          | female | 46  | 8.31                 | 70        | CEBPA, ASXL1        |
|          | female | 22  | 4.38                 | 63.5      | CEBPA               |
| M2       | male   | 26  | 15.4                 | 57.5      | AML1-ETO+, c-kit    |
|          | male   | 32  | 6.1                  | 27        | AML1-ETO+, c-kit    |
|          | male   | 62  | 8.8                  | 59        | ASXL, CEBPA, TET2   |
|          | male   | 49  | 28.33                | 45        | NA                  |
|          | male   | 24  | 26.54                | 43        | RUNX1, IDH2         |
| M3       | female | 20  | 9.26                 | 58        | PML-RAR $\alpha$    |
|          | female | 14  | 6.83                 | 63        | PML-RAR $\alpha$    |
|          | female | 25  | 6.69                 | 81        | PML-RAR $\alpha$    |
| M4       | female | 24  | 31.1                 | 35        | DNMT3A              |
|          | female | 58  | 28.9                 | 28        | DNMT3A, IDH2, NRAS  |
|          | male   | 50  | 49.6                 | 52.5      | DNMT3A, IDH2, TET2  |
| M5       | male   | 42  | 23.83                | 39        | NA                  |
|          | male   | 35  | 3.84                 | 45.5      | NPM1                |
|          | male   | 60  | 1.1                  | 51        | TET2                |
|          | female | 40  | 67.69                | 89        | FLT3-ITD            |
|          | female | 23  | 6.06                 | 23        | TET2                |
| M6       | female | 33  | 2.13                 | 56        | NA                  |
|          | female | 18  | 8.23                 | 58        | NPM1                |
|          | male   | 44  | 5.63                 | 49        | FLT3-ITD            |

NA: not available.

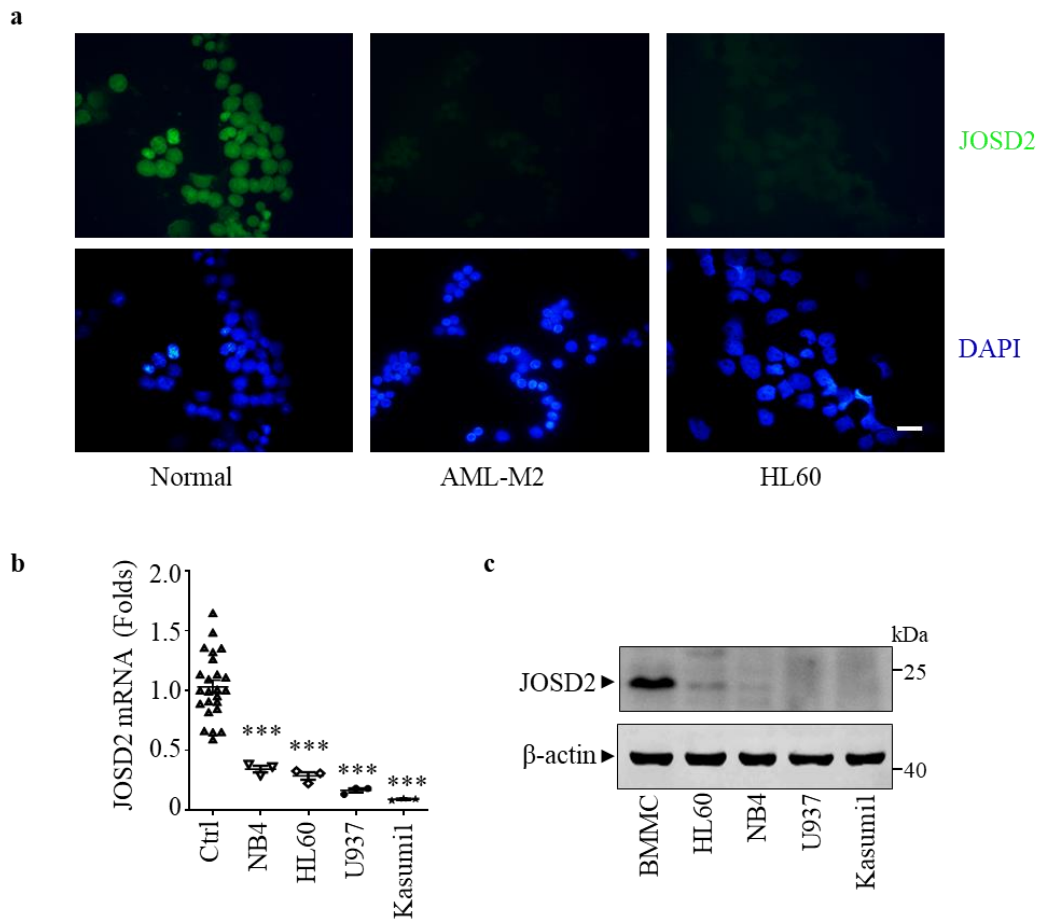

**Figure 1 Expression of JOSD2 in AML.** **a** Immunofluorescence analysis of JOSD2 protein expression in PBMCs from health donors, primary AML patients (M2) and AML cell lines. Scale bar, 20  $\mu$ m. **b** mRNA levels of JOSD2 in AML cell lines compared with normal peripheral blood mononuclear cells. **c** Western blot analysis of JOSD2 protein expression in bone marrow mononuclear cells from health donors and AML cell lines. Data are presented as mean  $\pm$  SD, and were analyzed by using One-way ANOVA. \*\*\* $P$ <0.001

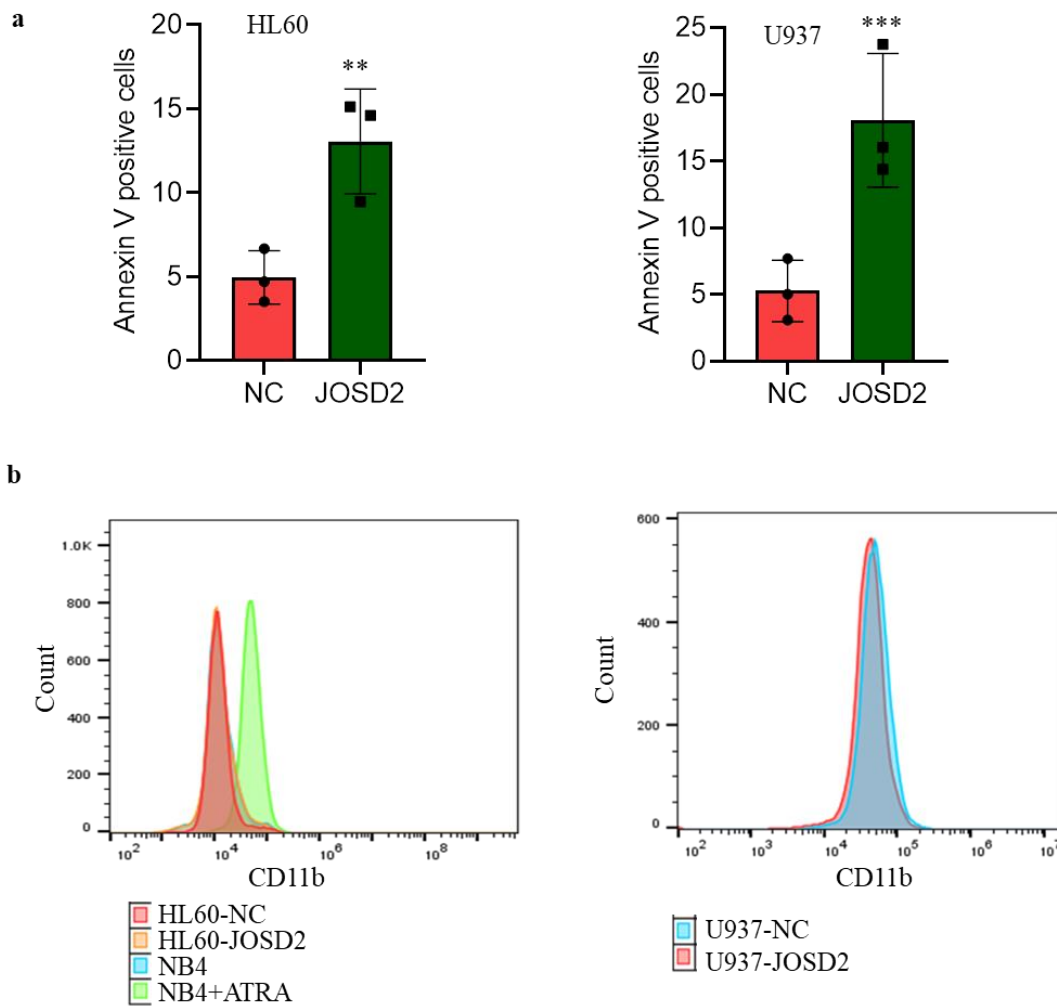

**Figure 2 Changes of apoptosis and differentiation after overexpression of JOSD2 in AML cells.** **a** Cell apoptosis was determined by flow cytometric analysis of Annexin V and PI staining. **b** Cell differentiation was determined by flow cytometric analysis of side-scatter profiles (SSC) and the expression of CD11b. Data are presented as mean  $\pm$  SD, and were analyzed by using the 2-tailed Student t test. \*\* $P < 0.01$ , \*\*\* $P < 0.001$ .

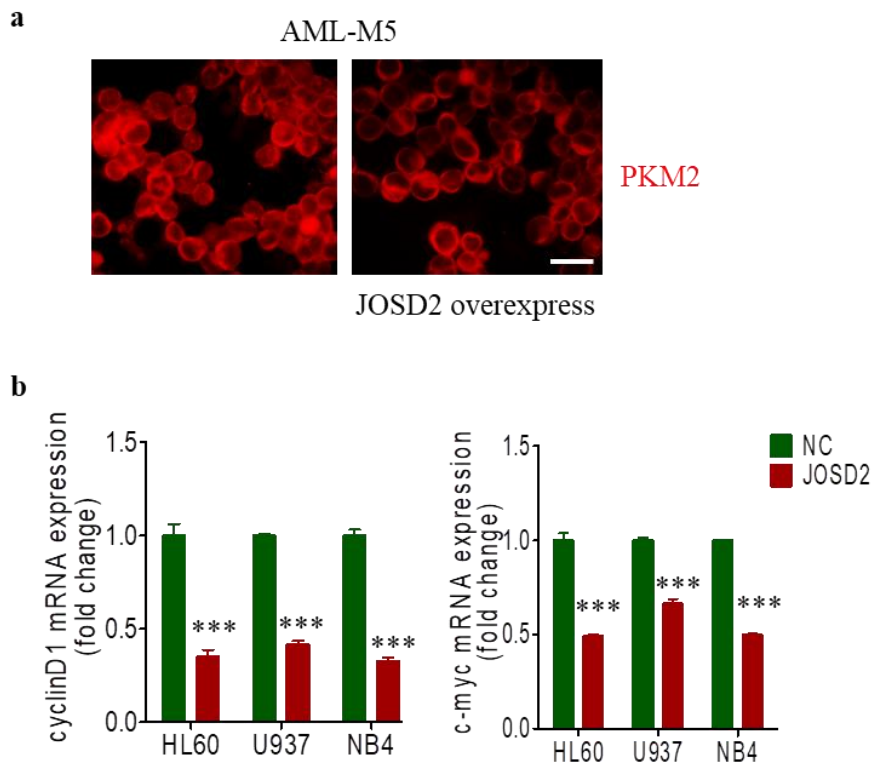

**Figure 3 JOSD2 blocks PKM2 nuclear localization and inhibited the expression of the related genes cyclin D1 and c-myc. a** Immunofluorescence assay shows that JOSD2 blocks PKM2 nuclear localization in primary AML (M5) cells. Scale bar, 20  $\mu$ m. **b** JOSD2 expression inhibited the transcription levels of cyclin D1 and c-myc, the downstream target genes of PKM2 nuclear localization. Data are presented as mean  $\pm$  SD, and were analyzed by using the 2-tailed Student t test. \*\*\* $P$ <0.001.
